# Supplementary material for: Anti-inflammatory effects of novel curcumin analogs in experimental acute lung injury
Source: PubMed Central journal article supplement (PMC4391684; doi:10.1186/s12931-015-0199-1), 2015-03-24
Supplement: 12931_2015_199_MOESM1_ESM.pdf [file 12931_2015_199_MOESM1_ESM.pdf]

Additional File 1

## **Anti-inflammatory effects of novel curcumin analogs in experimental acute lung injury**

Yali Zhang<sup>1,2,#</sup>, Dandan Liang<sup>1,#</sup>, Lili Dong<sup>3</sup>, Xiangting Ge<sup>3</sup>, Fengli Xu<sup>3</sup>, Yuanrong Dai<sup>3</sup>, Peng Zou<sup>2</sup>, Shulin Yang<sup>2,\*</sup>, Guang Liang<sup>1,\*</sup>

1. Chemical Biology Research Center at School of Pharmaceutical Sciences, Wenzhou Medical University, Wenzhou, Zhejiang 325035, China
2. School of Environmental and Biological Engineering, Nanjing University of Science and Technology, Nanjing, Jiangsu 210094, China
3. The 2<sup>nd</sup> Affiliated Hospital, Wenzhou Medical University, Wenzhou, Zhejiang 325035, China

**Table S1 The sequences of primers**

| Primers                        | Sequences                  |
|--------------------------------|----------------------------|
| Human TNF- $\alpha$ sense      | CCCAGGGACCTCTCTCTAATC      |
| Human TNF- $\alpha$ antisense  | ATGGGCTACAGGCTTGTCACT      |
| Human IL-6 sense               | GCACTGGCAGAAAACAACCT       |
| Human IL-6 antisense           | TCAAACCTCCAAAAGACCAGTGA    |
| Human IL-1 $\beta$ sense       | ACGCTCCGGGACTCACAGCA       |
| Human IL-1 $\beta$ antisense   | TGAGGCCCAAGGCCACAGGT       |
| Human COX-2 sense              | TTCTCCTTGAAAGGACTTATGGGTAA |
| Human COX-2 antisense          | AGAACTTGCATTGATGGTGACTGTTT |
| Human $\beta$ -actin sense     | CCTGGCACCCAGCACAAAT        |
| Human $\beta$ -actin antisense | GCCGATCCACACGGAGTACT       |
