# Supplementary material for: Anti-inflammatory effects of novel curcumin analogs in experimental acute lung injury
Source: PubMed Central journal article supplement (PMC4391684; doi:10.1186/s12931-015-0199-1), 2015-03-24
Supplement: 12931_2015_199_MOESM2_ESM.pdf [file 12931_2015_199_MOESM2_ESM.pdf]

Additional File 2

## **Anti-inflammatory effects of novel curcumin analogs in experimental acute lung injury**

Yali Zhang<sup>1,2,#</sup>, Dandan Liang<sup>1,#</sup>, Lili Dong<sup>3</sup>, Xiangting Ge<sup>3</sup>, Fengli Xu<sup>3</sup>, Yuanrong Dai<sup>3</sup>, Peng Zou<sup>2</sup>, Shulin Yang<sup>2,\*</sup>, Guang Liang<sup>1,\*</sup>

1. Chemical Biology Research Center at School of Pharmaceutical Sciences, Wenzhou Medical University, Wenzhou, Zhejiang 325035, China
2. School of Environmental and Biological Engineering, Nanjing University of Science and Technology, Nanjing, Jiangsu 210094, China
3. The 2<sup>nd</sup> Affiliated Hospital, Wenzhou Medical University, Wenzhou, Zhejiang 325035, China

## Spectral data

### Synthesis of morpholine enamines **2a** and **2b**

To a solution of morpholine (0.12 mol) in dry toluene (70 mL) was added cyclopentanone or cyclohexanone (0.1 mol) dropwise, followed by p-toluenesulfonic acid (1.16 mmol) at room temperature. The mixture solution was then refluxed for 5h. The resulting solution was concentrated in vacuo to give morpholine enamines **2a** and **2b** with the yields of 60-85%.

### Synthesis of $\alpha,\beta$ -unsaturated ketones **3a**, **3b**, **4a** and **4b**

A solution of morpholine enamines **2a** or **2b** (3.0 equiv) in Ethanol (15 mL) was added 2-trifluorobenzaldehyde or 2-nitrobenzaldehyde (1 equiv) portion wise. After refluxing for 4-5h, the resulting mixture was acidated to a pH of 5-6 by a solution of 5% HCl, diluted with brine and extracted with EtOAc (3×10 mL). The combined organic layers were washed with brine and dried over anhydrous MgSO<sub>4</sub>, filtered and concentrated under reduced pressure. The residue was further purified by chromatography on silica gel to give desired ketones **3a**, **3b**, **4a** and **4b**.

### Synthesis of asymmetric MACs **a1-a10**, **a12-a16**, **a19**, **b10-b20** and **b22-b25**.

To a stirring solution of **3a**, **3b**, **4a**, **4b** (0.37 mmol) and various aromatic aldehydes (0.37 mmol) in EtOH (10 mL) was added 20% NaOH dropwise. The reaction mixture was stirred at room temperature for 10h, then quenched with saturated aqueous NH<sub>4</sub>Cl solution (10 mL) and extracted with EtOAc (3×10 mL). The combined organic layers were washed with brine (15 mL) and dried over anhydrous MgSO<sub>4</sub>, filtered, and concentrated under reduced pressure. The residue was purified by recrystallization or chromatography on silica gel to furnish target MACs **a1-a10**, **a12-a16**, **a19**, **b10-b20** and **b22-b25**.

(2E,6E)-2-(4-morpholinobenzylidene)-6-(2-(trifluoromethyl)benzylidene)cyclohexanone (**a1**)

Red powder, 36.7% yield, m.p 176.9-179.4 °C. <sup>1</sup>H-NMR (600 MHz, CDCl<sub>3</sub>)  $\delta$  (ppm) 7.921 (1H, s, H- $\beta$ ), 7.791(1H, s, H- $\beta'$ ), 7.710 (1H, d,  $J$  = 7.8 Hz, H-3), 7.540 (1H, t,  $J$  = 7.2 Hz, H-5), 7.469 (2H, d,  $J$  = 8.4 Hz, H-2', H-6'), 7.418 (1H, t,  $J$  = 7.8 Hz, H-4), 7.314 (1H, d,  $J$  = 7.2 Hz, H-6), 6.919 (2H, d,  $J$  = 8.4 Hz, H-3', H-5'), 3.872 (4H, t,  $J$  =

4.8 Hz, Ar-morpholine-CH<sub>2</sub>CH<sub>2</sub>OCH<sub>2</sub>CH<sub>2</sub>-), 3.259 (4H, t, *J* = 4.8 Hz, Ar-morpholine-CH<sub>2</sub>CH<sub>2</sub>OCH<sub>2</sub>CH<sub>2</sub>-), 2.935 (2H, t, *J* = 5.4 Hz, Cyclohexanone-CH<sub>2</sub>CH<sub>2</sub>CH<sub>2</sub>-), 2.613 (2H, t, *J* = 4.8 Hz, Cyclohexanone-CH<sub>2</sub>CH<sub>2</sub>CH<sub>2</sub>-), 1.741-1.782 (2H, m, Cyclohexanone-CH<sub>2</sub>CH<sub>2</sub>CH<sub>2</sub>-). ESI-MS *m/z*: 428.4 (M+H)<sup>+</sup>.

(2E,6E)-2-(4-(4-methylpiperazin-1-yl)benzylidene)-6-(2-(trifluoromethyl)benzylidene)cyclohexanone (**a2**)

Red powder, 50.7% yield, m.p 100.1-102.8 °C. <sup>1</sup>H-NMR (600 MHz, DMSO) δ (ppm) 7.825 (1H, s, H-β), 7.727 (2H, d, *J* = 3.6 Hz, H-2', H-6'), 7.594 (2H, d, *J* = 16.2 Hz, H-3, H-6), 7.514 (1H, t, *J* = 7.8 Hz, H-5), 7.470 (1H, s, H-β'), 7.455 (1H, t, *J* = 9 Hz, H-4), 6.995 (2H, d, *J* = 9 Hz, H-3', H-5'), 3.269 [4H, t, *J* = 4.8 Hz, Ar-N-methylpiperazine-CH<sub>2</sub>CH<sub>2</sub>N(CH<sub>3</sub>)CH<sub>2</sub>CH<sub>2</sub>-], 2.892 (2H, t, *J* = 6 Hz, Cyclohexanone-CH<sub>2</sub>CH<sub>2</sub>CH<sub>2</sub>-), 2.612 (2H, t, *J* = 6 Hz, Cyclohexanone-CH<sub>2</sub>CH<sub>2</sub>CH<sub>2</sub>-), 2.434 [4H, t, *J* = 4.8 Hz, Ar-N-methylpiperazine-CH<sub>2</sub>CH<sub>2</sub>N(CH<sub>3</sub>)CH<sub>2</sub>CH<sub>2</sub>-], 2.217 (3H, s, Ar-N-methylpiperazine-CH<sub>3</sub>), 1.625-1.795 (2H, m, Cyclohexanone-CH<sub>2</sub>CH<sub>2</sub>CH<sub>2</sub>-). ESI-MS *m/z*: 441.6 (M+H)<sup>+</sup>.

(2E,6E)-2-(4-(3-(dimethylamino)propoxy)benzylidene)-6-(2-(trifluoromethyl)benzylidene)cyclohexanone (**a3**)

Yellow oil, 51.6% yield. <sup>1</sup>H-NMR (600 MHz, CDCl<sub>3</sub>) δ (ppm) 7.894 (1H, s, H-β), 7.825 (1H, s, H-β'), 7.647 (2H, d, *J* = 3.6 Hz, H-2', H-6'), 7.572 (1H, d, *J* = 9 Hz, H-3), 7.564 (1H, d, *J* = 9 Hz, H-5), 7.440 (1H, d, *J* = 7.8 Hz, H-6), 7.344 (1H, t, *J* = 5.4 Hz, H-4), 7.034 (2H, d, *J* = 5.4 Hz, H-3', H-5'), 4.053 [2H, t, *J* = 6.6 Hz, Ar-OCH<sub>2</sub>CH<sub>2</sub>CH<sub>2</sub>N(CH<sub>3</sub>)<sub>2</sub>], 2.503 (2H, t, *J* = 1.8 Hz, Cyclohexanone-CH<sub>2</sub>CH<sub>2</sub>CH<sub>2</sub>-), 2.497 (2H, t, *J* = 1.8 Hz, Cyclohexanone-CH<sub>2</sub>CH<sub>2</sub>CH<sub>2</sub>-), 2.364 [2H, t, *J* = 3.6 Hz, Ar-OCH<sub>2</sub>CH<sub>2</sub>CH<sub>2</sub>N(CH<sub>3</sub>)<sub>2</sub>], 2.155 [6H, s, Ar-OCH<sub>2</sub>CH<sub>2</sub>CH<sub>2</sub>N(CH<sub>3</sub>)<sub>2</sub>], 1.825-1.862 [2H, m, Ar-OCH<sub>2</sub>CH<sub>2</sub>CH<sub>2</sub>N(CH<sub>3</sub>)<sub>2</sub>], 1.255-1.412 (2H, m, Cyclohexanone-CH<sub>2</sub>CH<sub>2</sub>CH<sub>2</sub>-). ESI-MS *m/z*: 444.4 (M+H)<sup>+</sup>.

(2E,6E)-2-(4-(piperidin-1-yl)benzylidene)-6-(2-(trifluoromethyl)benzylidene)cyclohe

xanone (**a4**)

Red oil, 31.7% yield. <sup>1</sup>H-NMR (600 MHz, CDCl<sub>3</sub>) δ (ppm) 7.705 (1H, d, *J* = 7.8 Hz, H-2'), 7.633 (1H, d, *J* = 7.8 Hz, H-6'), 7.535 (1H, t, *J* = 7.8 Hz, H-5), 7.478 (1H, s, H-β), 7.440 (1H, d, *J* = 9 Hz, H-3), 7.352 (1H, t, *J* = 9 Hz, H-4), 7.351 (1H, s, H-β'), 7.313 (1H, d, *J* = 7.8 Hz, H-6), 6.905 (1H, d, *J* = 9 Hz, H-3'), 6.868 (1H, d, *J* = 8.4 Hz, H-5'), 3.285 (4H, t, *J* = 10.2 Hz, Ar-tetrahydropyridine-CH<sub>2</sub>CH<sub>2</sub>CH<sub>2</sub>CH<sub>2</sub>CH<sub>2</sub>-), 2.754 (2H, t, *J* = 5.4 Hz, Cyclohexanone-CH<sub>2</sub>CH<sub>2</sub>CH<sub>2</sub>-), 2.604 (2H, t, *J* = 4.8 Hz, Cyclohexanone-CH<sub>2</sub>CH<sub>2</sub>CH<sub>2</sub>-), 1.738-1.780 (2H, m, Cyclohexanone-CH<sub>2</sub>CH<sub>2</sub>CH<sub>2</sub>-), 1.678-1.693 (2H, m, Ar-tetrahydropyridine-CH<sub>2</sub>CH<sub>2</sub>CH<sub>2</sub>CH<sub>2</sub>CH<sub>2</sub>-), 1.600-1.632 (4H, m, Ar-tetrahydropyridine-CH<sub>2</sub>CH<sub>2</sub>CH<sub>2</sub>CH<sub>2</sub>CH<sub>2</sub>-). ESI-MS *m/z*: 426.2 (M+H)<sup>+</sup>.

(2E,6E)-2-(2-bromo-5-fluorobenzylidene)-6-(2-(trifluoromethyl)benzylidene)cyclohexanone (**a5**)

Yellow oil, 54.6% yield. <sup>1</sup>H-NMR (600 MHz, CDCl<sub>3</sub>) δ (ppm) 7.962 (1H, s, H-β), 7.850 (1H, s, H-β'), 7.725 (1H, d, *J* = 7.8 Hz, H-3), 7.598 (1H, d, *J* = 5.4 Hz, H-3'), 7.557 (1H, d, *J* = 7.8 Hz, H-5), 7.441 (1H, t, *J* = 7.8 Hz, H-4), 7.330 (1H, d, *J* = 7.8 Hz, H-6), 7.041 (1H, d, *J* = 6.6 Hz, H-4'), 6.22-6.941 (1H, m, H-6'), 2.739 (2H, t, *J* = 4.8 Hz, Cyclohexanone-CH<sub>2</sub>CH<sub>2</sub>CH<sub>2</sub>-), 2.647 (2H, t, *J* = 5.4 Hz, Cyclohexanone-CH<sub>2</sub>CH<sub>2</sub>CH<sub>2</sub>-), 1.739-1.770 (2H, m, Cyclohexanone-CH<sub>2</sub>CH<sub>2</sub>CH<sub>2</sub>-). ESI-MS *m/z*: 439.6 (M)<sup>+</sup>.

(2E,6E)-2-(2-bromo-6-fluorobenzylidene)-6-(2-(trifluoromethyl)benzylidene)cyclohexanone (**a6**)

Yellow powder, 44.7% yield, m.p 99.2-102.5 °C. <sup>1</sup>H-NMR (600 MHz, CDCl<sub>3</sub>) δ (ppm) 7.968 (1H, s, H-β), 7.929 (1H, s, H-β'), 7.724 (1H, d, *J* = 7.8 Hz, H-3), 7.542 (1H, d, *J* = 6 Hz, H-5), 7.532 (1H, t, *J* = 8.4 Hz, H-4), 7.507 (2H, d, *J* = 12 Hz, H-6, H-3'), 7.443 (1H, d, *J* = 7.8 Hz, H-5'), 7.416 (1H, t, *J* = 5.4 Hz, H-4'), 2.647 (4H, t, *J* = 6 Hz, Cyclohexanone-CH<sub>2</sub>CH<sub>2</sub>CH<sub>2</sub>-), 1.709-1.729 (2H, m, Cyclohexanone-CH<sub>2</sub>CH<sub>2</sub>CH<sub>2</sub>-). ESI-MS *m/z*: 439.4 (M)<sup>+</sup>.

(2E,6E)-2-(4-bromobenzylidene)-6-(2-(trifluoromethyl)benzylidene)cyclohexanone

**(a7)**

Yellow powder, 25.6% yield, m.p 129.7-132.3 °C. <sup>1</sup>H-NMR (600 MHz, CDCl<sub>3</sub>) δ (ppm) 7.945 (1H, s, H-β), 7.720 (2H, d, *J* = 9.0 Hz, H-2', H-6'), 7.557 (1H, d, *J* = 7.8 Hz, H-3), 7.537 (2H, d, *J* = 6.4 Hz, H-3', H-5'), 7.434 (1H, t, *J* = 7.2 Hz, H-5), 7.331 (1H, s, H-β'), 7.327 (1H, d, *J* = 6.0 Hz, H-6), 7.317 (1H, t, *J* = 4.2 Hz, H-4), 2.874 (2H, t, *J* = 5.4 Hz, Cyclohexanone-CH<sub>2</sub>CH<sub>2</sub>CH<sub>2</sub>-), 2.631 (2H, t, *J* = 5.4 Hz, Cyclohexanone-CH<sub>2</sub>CH<sub>2</sub>CH<sub>2</sub>-), 1.743-1.763 (2H, m, Cyclohexanone-CH<sub>2</sub>CH<sub>2</sub>CH<sub>2</sub>-). ESI-MS *m/z*: 423.1 (M)<sup>+</sup>.

(2E,6E)-2-(2,5-dibromobenzylidene)-6-(2-(trifluoromethyl)benzylidene)cyclohexanone

**(a8)**

Yellow oil, 54.6% yield. <sup>1</sup>H-NMR (600 MHz, CDCl<sub>3</sub>) δ(ppm) 7.959 (1H, s, H-β), 7.741 (1H, s, H-β'), 7.726 (1H, d, *J* = 7.8 Hz, H-3), 7.599 (1H, t, *J* = 7.2 Hz, H-5), 7.500 (1H, d, *J* = 8.4 Hz, H-3'), 7.448 (1H, d, *J* = 7.2 Hz, H-4'), 7.427 (2H, t, *J* = 2.4 Hz, H-4, H-6'), 7.332 (1H, d, *J* = 5.4 Hz, H-6), 2.732 (2H, t, *J* = 4.8 Hz, Cyclohexanone-CH<sub>2</sub>CH<sub>2</sub>CH<sub>2</sub>-), 2.648 (2H, t, *J* = 5.4 Hz, Cyclohexanone-CH<sub>2</sub>CH<sub>2</sub>CH<sub>2</sub>-), 1.741 -1.761 (2H, m, Cyclohexanone-CH<sub>2</sub>CH<sub>2</sub>CH<sub>2</sub>-). ESI-MS *m/z*: 501.3 (M+H)<sup>+</sup>.

(2E,6E)-2-(3,4-dimethoxybenzylidene)-6-(2-nitrobenzylidene)cyclohexanone **(a9)**

Yellow powder, 70.6% yield, m.p 131.8-135.5 °C. <sup>1</sup>H-NMR (600 MHz, CDCl<sub>3</sub>) δ(ppm) 8.225 (1H, d, *J* = 7.2 Hz, H-3), 7.947 (1H, s, H-β), 7.792 (1H, s, H-β'), 7.640 (1H, t, *J* = 15.0 Hz, H-4), 7.500 (1H, t, *J* = 15.6 Hz, H-5), 7.370 (1H, d, *J* = 7.8 Hz, H-6), 7.123 (1H, d, *J* = 8.4 Hz, H-6'), 7.027 (1H, s, H-2'), 6.915 (1H, d, *J* = 8.4 Hz, H-5'), 3.928 (3H, s, 3'-OCH<sub>3</sub>), 3.914 (3H, s, 4'-OCH<sub>3</sub>), 2.949 (2H, t, *J* = 10.2 Hz, Cyclohexanone-CH<sub>2</sub>CH<sub>2</sub>CH<sub>2</sub>-), 2.605 (2H, t, *J* = 10.2 Hz, Cyclohexanone-CH<sub>2</sub>CH<sub>2</sub>CH<sub>2</sub>-), 1.766-1.808 (2H, m, Cyclohexanone-CH<sub>2</sub>CH<sub>2</sub>CH<sub>2</sub>-). ESI-MS *m/z*: 380.1 (M+H)<sup>+</sup>.

(2E,6E)-2-(2,3-dimethoxybenzylidene)-6-(2-nitrobenzylidene)cyclohexano (**a10**)

Orange powder, 63.2% yield, m.p 124.3-129.1 °C. <sup>1</sup>H-NMR (600 MHz, CDCl<sub>3</sub>) δ(ppm) 8.127 (1H, d, *J* = 8.4 Hz, H-3), 7.955 (2H, s, H-β, H-β'), 7.640 (1H, t, *J* = 14.4 Hz, H-4), 7.501 (1H, t, *J* = 14.4 Hz, H-5), 7.376 (1H, d, *J* = 7.8 Hz, H-6), 7.065 (1H, t, *J* = 15.0 Hz, H-5'), 6.930 (2H, d, *J* = 8.4 Hz, H-4', H-6'), 3.889 (3H, s, 2'-OCH<sub>3</sub>), 3.834 (3H, s, 3'-OCH<sub>3</sub>), 2.804 (2H, t, *J* = 10.2 Hz, Cyclohexanone-CH<sub>2</sub>CH<sub>2</sub>CH<sub>2</sub>-), 2.604 (2H, t, *J* = 10.2 Hz, Cyclohexanone-CH<sub>2</sub>CH<sub>2</sub>CH<sub>2</sub>-), 1.709-1.750 (2H, m, Cyclohexanone-CH<sub>2</sub>CH<sub>2</sub>CH<sub>2</sub>-). ESI-MS *m/z*: 380.0 (M+H)<sup>+</sup>.

(2E,6E)-2-(2-fluoro-4-methoxybenzylidene)-6-(2-nitrobenzylidene)cyclohexanone (**a12**)

Yellow oil, 40.7% yield, <sup>1</sup>H-NMR (600 MHz, CDCl<sub>3</sub>) δ(ppm) 8.125 (1H, d, *J* = 8.4 Hz, H-3), 7.947 (1H, s, H-β), 7.850 (1H, s, H-β'), 7.640 (1H, t, *J* = 14.4 Hz, H-4), 7.500 (1H, t, *J* = 15.6 Hz, H-5), 7.368 (1H, d, *J* = 8.4 Hz, H-6), 7.345 (1H, s, H-3'), 6.727 (1H, d, *J* = 10.8 Hz, H-6'), 6.675 (1H, d, *J* = 14.4 Hz, H-5'), 3.836 (3H, s, 4'-OCH<sub>3</sub>), 2.815 (2H, t, *J* = 10.8 Hz, Cyclohexanone-CH<sub>2</sub>CH<sub>2</sub>CH<sub>2</sub>-), 2.604 (2H, t, *J* = 10.2 Hz, Cyclohexanone-CH<sub>2</sub>CH<sub>2</sub>CH<sub>2</sub>-), 1.738-1.780 (2H, m, Cyclohexanone-CH<sub>2</sub>CH<sub>2</sub>CH<sub>2</sub>-). ESI-MS *m/z*: 368.0 (M+H)<sup>+</sup>.

(2E,6E)-2-(2-methoxybenzylidene)-6-(2-nitrobenzylidene)cyclohexanone (**a13**)

Yellow powder, 69.4% yield, m.p 148.8-153.9 °C. <sup>1</sup>H-NMR (600 MHz, CDCl<sub>3</sub>) δ(ppm) 8.119 (1H, d, *J* = 8.4 Hz, H-3), 8.030 (1H, s, H-β), 7.943 (1H, s, H-β'), 7.635 (1H, t, *J* = 14.4 Hz, H-4), 7.495 (1H, t, *J* = 15.6 Hz, H-5), 7.368 (1H, d, *J* = 7.8 Hz, H-6), 7.336 (1H, t, *J* = 15.6 Hz, H-5'), 7.317 (1H, d, *J* = 13.8 Hz, H-6'), 6.967 (1H, t, *J* = 14.4 Hz, H-4'), 6.928 (1H, d, *J* = 8.4 Hz, H-3'), 3.875 (3H, s, 2'-OCH<sub>3</sub>), 2.847 (2H, t, *J* = 10.8 Hz, Cyclohexanone-CH<sub>2</sub>CH<sub>2</sub>CH<sub>2</sub>-), 2.607 (2H, t, *J* = 10.8 Hz, Cyclohexanone-CH<sub>2</sub>CH<sub>2</sub>CH<sub>2</sub>-), 1.720-1.761 (2H, m, Cyclohexanone-CH<sub>2</sub>CH<sub>2</sub>CH<sub>2</sub>-). ESI-MS *m/z*: 350.1 (M+H)<sup>+</sup>.

(2E,6E)-2-(3-bromo-4-methoxybenzylidene)-6-(2-nitrobenzylidene)cyclohexanone

**(a14)**

Yellow powder, 66.0% yield, m.p: 183.2-187.2 °C. <sup>1</sup>H-NMR (600 MHz, CDCl<sub>3</sub>) δ(ppm) 8.130 (1H, d, *J* = 7.8 Hz, H-3), 7.948 (1H, s, H-2'), 7.712 (2H, s, H-β, H-β'), 7.644 (1H, t, *J* = 15.0 Hz, H-4), 7.505 (1H, t, *J* = 15.0 Hz, H-5), 7.419 (1H, d, *J* = 10.2 Hz, H-6), 7.368 (1H, d, *J* = 7.2 Hz, H-6'), 6.940 (1H, d, *J* = 8.4 Hz, H-5'), 3.942 (3H, s, 4'-OCH<sub>3</sub>), 2.910 (2H, t, *J* = 10.2 Hz, Cyclohexanone-CH<sub>2</sub>CH<sub>2</sub>CH<sub>2</sub>-), 2.604 (2H, t, *J* = 10.2 Hz, Cyclohexanone-CH<sub>2</sub>CH<sub>2</sub>CH<sub>2</sub>-), 1.765-1.807 (2H, m, Cyclohexanone-CH<sub>2</sub>CH<sub>2</sub>CH<sub>2</sub>-). ESI-MS *m/z*: 429.8 (M+H)<sup>+</sup>.

(2E,6E)-2-(5-bromo-2-ethoxybenzylidene)-6-(2-nitrobenzylidene)cyclohexanone

**(a15)**

Yellow powder, 67.8% yield, m.p 154.1-158.6 °C. <sup>1</sup>H-NMR (600 MHz, CDCl<sub>3</sub>) δ(ppm) 8.127 (1H, d, *J* = 8.4 Hz, H-3), 7.950 (1H, s, H-β), 7.924 (1H, s, H-β'), 7.643 (1H, t, *J* = 15.0 Hz, H-4), 7.504 (1H, t, *J* = 14.4 Hz, H-5), 7.405 (1H, s, H-6'), 7.374 (2H, d, *J* = 7.8 Hz, H-6, H-3'), 6.787 (1H, d, *J* = 8.4 Hz, H-4'), 4.048-4.083 (2H, m, Ar-OCH<sub>2</sub>CH<sub>3</sub>), 2.832 (2H, t, *J* = 12.0 Hz, Cyclohexanone-CH<sub>2</sub>CH<sub>2</sub>CH<sub>2</sub>-), 2.615 (2H, t, *J* = 12.0 Hz, Cyclohexanone-CH<sub>2</sub>CH<sub>2</sub>CH<sub>2</sub>-), 1.740-1.781 (2H, m, Cyclohexanone-CH<sub>2</sub>CH<sub>2</sub>CH<sub>2</sub>-), 1.453 (3H, t, *J* = 13.8 Hz, Ar-OCH<sub>2</sub>CH<sub>3</sub>). ESI-MS *m/z*: 443.8 (M+H)<sup>+</sup>.

(2E,6E)-2-(2-fluoro-5-methoxybenzylidene)-6-(2-nitrobenzylidene)cyclohexanone

**(a16)**

Yellow powder, 77.8% yield, m.p 139.3-144.0 °C. <sup>1</sup>H-NMR (600 MHz, CDCl<sub>3</sub>) δ(ppm) 8.133 (1H, d, *J* = 7.8 Hz, H-3), 7.957 (1H, s, H-β), 7.792 (1H, s, H-β'), 7.647 (1H, t, *J* = 15.0 Hz, H-4), 7.510 (1H, t, *J* = 15.6 Hz, H-5), 7.373 (1H, d, *J* = 7.8 Hz, H-6), 7.032 (1H, t, *J* = 18 Hz, H-3'), 6.840-6.852 (2H, m, H-4', H-6'), 3.803 (3H, s, 5'-OCH<sub>3</sub>), 2.800 (2H, t, *J* = 11.4 Hz, Cyclohexanone-CH<sub>2</sub>CH<sub>2</sub>CH<sub>2</sub>-), 2.615 (2H, t, *J* = 10.2 Hz, Cyclohexanone-CH<sub>2</sub>CH<sub>2</sub>CH<sub>2</sub>-), 1.735-1.777 (2H, m, Cyclohexanone-CH<sub>2</sub>CH<sub>2</sub>CH<sub>2</sub>-). ESI-MS *m/z*: 367.9 (M+H)<sup>+</sup>.

(2E,6E)-2-(4-ethoxybenzylidene)-6-(2-nitrobenzylidene)cyclohexanone (**a19**)

Yellow powder, 67.0% yield, m.p 142.3-143.7 °C. <sup>1</sup>H-NMR (600 MHz, DMSO) δ(ppm) 8.158 (1H, d, *J* = 7.2 Hz, H-3), 7.803 (1H, t, *J* = 13.8 Hz, H-4), 7.756 (1H, s, H-β), 7.652 (1H, t, *J* = 13.8 Hz, H-5), 7.637 (1H, s, H-β'), 7.570 (1H, d, *J* = 7.2 Hz, H-6), 7.540 (2H, d, *J* = 9.0 Hz, H-2', H-6'), 7.014 (2H, d, *J* = 9.0 Hz, H-3', H-5'), 4.071-4.106 (2H, m, 4'-OCH<sub>2</sub>CH<sub>3</sub>), 2.896 (2H, t, *J* = 10.8 Hz, Cyclohexanone-CH<sub>2</sub>CH<sub>2</sub>-), 2.619 (2H, t, *J* = 10.8 Hz, Cyclohexanone-CH<sub>2</sub>CH<sub>2</sub>CH<sub>2</sub>-), 1.674-1.715 (2H, m, Cyclohexanone-CH<sub>2</sub>CH<sub>2</sub>CH<sub>2</sub>-), 1.345 (3H, t, *J* = 13.8 Hz, 4'-OCH<sub>2</sub>CH<sub>3</sub>). ESI-MS m/z: 364.9 (M+H)<sup>+</sup>.

(2E,5E)-2-(2,3-dimethoxybenzylidene)-5-(2-nitrobenzylidene)cyclopentanone (**b10**)

Yellow powder, 60.9% yield, m.p 120.8-124.0 °C. <sup>1</sup>H-NMR (600 MHz, CDCl<sub>3</sub>) δ(ppm) 8.072 (1H, d, *J* = 8.4 Hz, H-3), 7.961 (1H, s, H-β), 7.821 (1H, s, H-β'), 7.656 (1H, t, *J* = 14.4 Hz, H-4), 7.573 (1H, d, *J* = 7.2 Hz, H-6), 7.515 (1H, t, *J* = 15.0 Hz, H-5), 7.132 (1H, d, *J* = 7.2 Hz, H-6'), 7.098 (1H, t, *J* = 15.6 Hz, H-5'), 6.972 (1H, d, *J* = 7.8 Hz, H-4'), 3.896 (3H, s, 2'-OCH<sub>3</sub>), 3.877 (3H, s, 3'-OCH<sub>3</sub>), 3.003 (2H, t, *J* = 7.8 Hz, Cyclopentanone-CH<sub>2</sub>CH<sub>2</sub>-), 2.890 (2H, t, *J* = 7.8 Hz, Cyclopentanone-CH<sub>2</sub>CH<sub>2</sub>-). ESI-MS m/z: 366.1 (M+H)<sup>+</sup>.

(2E,5E)-2-(3-bromo-4-methoxybenzylidene)-5-(2-(trifluoromethyl)benzylidene)cyclopentanone (**b14**)

Yellow powder, 61.9% yield, m.p 95.4-100.8 °C. <sup>1</sup>H-NMR (600 MHz, CDCl<sub>3</sub>) δ (ppm) 7.871 (1H, s, H-2'), 7.813 (1H, s, H-β), 7.748 (1H, d, *J* = 7.8 Hz, H-3), 7.585 (1H, d, *J* = 7.2 Hz, H-6'), 7.579 (1H, t, *J* = 7.2 Hz, H-5), 7.546 (1H, d, *J* = 8.4 Hz, H-6), 7.470 (1H, t, *J* = 7.2 Hz, H-4), 7.050 (1H, s, H-β'), 6.799 (1H, d, *J* = 4.8 Hz, H-5'), 2.969 (2H, t, *J* = 4.2 Hz, Cyclopentanone-CH<sub>2</sub>CH<sub>2</sub>-), 2.948 (2H, t, *J* = 4.2 Hz, Cyclopentanone-CH<sub>2</sub>CH<sub>2</sub>-). ESI-MS m/z: 439.2 (M)<sup>+</sup>.

(2E,5E)-2-(4-ethoxybenzylidene)-5-(2-(trifluoromethyl)benzylidene)cyclopentanone (**b19**)

Yellow oil, 42.4% yield. <sup>1</sup>H-NMR (600 MHz, CDCl<sub>3</sub>) δ (ppm) 7.827 (1H, s, H-β),



7.738 (1H, d,  $J = 7.8$  Hz, H-3), 7.650 (1H, d,  $J = 1.8$  Hz, H-6), 7.601 (1H, t,  $J = 7.8$  Hz, H-5), 7.583 (1H, s, H- $\beta'$ ), 7.550 (2H, d,  $J = 9$  Hz, H-2', H-6'), 7.447 (1H, t,  $J = 7.8$  Hz, H-4), 6.951 (2H, d,  $J = 9$  Hz, H-3', H-5'), 4.072-4.107 (2H, m, 4'-OCH<sub>2</sub>CH<sub>3</sub>), 3.043 (2H, t,  $J = 4.2$  Hz, Cyclopentanone-CH<sub>2</sub>CH<sub>2</sub>-), 2.970 (2H, t,  $J = 4.2$  Hz, Cyclopentanone-CH<sub>2</sub>CH<sub>2</sub>-), 1.442 (3H, t,  $J = 7.2$  Hz, 4'-OCH<sub>2</sub>CH<sub>3</sub>). ESI-MS  $m/z$ : 373.2 (M+H)<sup>+</sup>.

(2E,5E)-2-(2-(trifluoromethyl)benzylidene)-5-(2,4,6-trimethylbenzylidene)cyclopentanone (**b20**)

Yellow powder, 65.4% yield, m.p 135.6-138.5 °C. <sup>1</sup>H-NMR (600 MHz, CDCl<sub>3</sub>)  $\delta$  (ppm) 7.849 (1H, t,  $J = 2.4$  Hz, H-5), 7.743 (1H, d,  $J = 7.8$  Hz, H-3), 7.671 (1H, s, H- $\beta$ ), 7.569 (1H, s, H- $\beta'$ ), 7.572 (1H, d,  $J = 3.6$  Hz, H-6), 7.452 (1H, t,  $J = 4.2$  Hz, H-4), 6.899 (2H, s, H-3', H-5'), 2.853 (2H, t,  $J = 7.2$  Hz, Cyclopentanone-CH<sub>2</sub>CH<sub>2</sub>-), 2.470 (2H, t,  $J = 7.2$  Hz, Cyclopentanone-CH<sub>2</sub>CH<sub>2</sub>-), 2.299 (3H, s, 4'-CH<sub>3</sub>), 2.189 (6H, s, 2'-CH<sub>3</sub>, 6'-CH<sub>3</sub>). ESI-MS  $m/z$ : 371.5 (M+H)<sup>+</sup>.

(2E,5E)-2-(2-bromo-4,5-dimethoxybenzylidene)-5-(2-(trifluoromethyl)benzylidene)cyclopentanone (**b22**)

Yellow powder, 45.8% yield, m.p 177.8-179.1 °C. <sup>1</sup>H-NMR (600 MHz, CDCl<sub>3</sub>)  $\delta$  (ppm) 7.853 (2H, s, H- $\beta$ , H- $\beta'$ ), 7.745 (1H, d,  $J = 7.8$  Hz, H-3), 7.578 (1H, t,  $J = 6.6$  Hz, H-5), 7.568 (1H, d,  $J = 6.6$  Hz, H-6), 7.460 (1H, t,  $J = 6$  Hz, H-4), 7.138 (1H, s, H-3'), 7.075 (1H, s, H-6'), 3.922 (3H, s, 5'-OCH<sub>3</sub>), 3.888 (3H, s, 4'-OCH<sub>3</sub>), 2.996 (2H, t,  $J = 3.6$  Hz, Cyclopentanone-CH<sub>2</sub>CH<sub>2</sub>-), 2.961 (2H, t,  $J = 3.6$  Hz, Cyclopentanone-CH<sub>2</sub>CH<sub>2</sub>-). ESI-MS  $m/z$ : 469.0 (M)<sup>+</sup>.

(2E,5E)-2-((5-methylthiophen-2-yl)methylene)-5-(2-(trifluoromethyl)benzylidene)cyclopentanone (**b23**)

Yellow oil, 66.7% yield. <sup>1</sup>H-NMR (600 MHz, CDCl<sub>3</sub>)  $\delta$  (ppm) 7.799 (1H, s, H- $\beta$ ), 7.731 (1H, d,  $J = 7.8$  Hz, H-3), 7.604 (1H, s, H- $\beta'$ ), 7.610 (1H, d,  $J = 7.2$  Hz, H-3'), 7.585 (1H, t,  $J = 7.2$  Hz, H-5), 7.446 (1H, t,  $J = 3.6$  Hz, H-4), 7.234 (1H, d,  $J = 3.6$  Hz,

H-6), 6.841 (1H, d,  $J = 3$  Hz, H-4'), 2.989 (2H, t,  $J = 6$  Hz, Cyclopentanone-CH<sub>2</sub>CH<sub>2</sub>-), 2.927 (2H, t,  $J = 6$  Hz, Cyclopentanone-CH<sub>2</sub>CH<sub>2</sub>-), 2.563 (3H, s, thiophen-CH<sub>3</sub>). ESI-MS  $m/z$ : 349.2 (M+H)<sup>+</sup>.

(2E,5E)-2-((3-methylthiophen-2-yl)methylene)-5-(2-(trifluoromethyl)benzylidene)cyclopentanone (**b24**)

Yellow powder, 65.4% yield, m.p 139.7-142.7 °C. <sup>1</sup>H-NMR (600 MHz, CDCl<sub>3</sub>)  $\delta$  (ppm) 7.932 (1H, s, H- $\beta$ ), 7.818 (1H, s, H- $\beta'$ ), 7.739 (1H, d,  $J = 8.4$  Hz, H-5'), 7.618 (1H, d,  $J = 7.8$  Hz, H-3), 7.590 (1H, t,  $J = 7.8$  Hz, H-5), 7.488 (1H, d,  $J = 5.4$  Hz, H-4'), 7.450 (1H, t,  $J = 7.2$  Hz, H-4), 7.005 (1H, d,  $J = 5.4$  Hz, H-6) 3.001 (2H, t,  $J = 3.6$  Hz, Cyclopentanone-CH<sub>2</sub>CH<sub>2</sub>-), 2.969 (2H, t,  $J = 3.6$  Hz, Cyclopentanone-CH<sub>2</sub>CH<sub>2</sub>-), 2.462 (3H, s, thiophen-CH<sub>3</sub>). ESI-MS  $m/z$ : 349.8 (M+H)<sup>+</sup>.

(2E,5E)-2-((5-bromo-1H-indol-3-yl)methylene)-5-(2-(trifluoromethyl)benzylidene)cyclopentanone (**b25**)

Red powder, 35.4% yield, m.p 113.2-116.8 °C. <sup>1</sup>H-NMR (600 MHz, DMSO)  $\delta$  (ppm) 12.189 (1H, s, -NH), 8.077 (1H, s, H-2'), 7.948 (1H, s, H- $\beta$ ), 7.897 (1H, d,  $J = 2.4$  Hz, H-3), 7.763 (1H, t,  $J = 7.2$  Hz, H-4), 7.701 (1H, d,  $J = 8.4$  Hz, H-6), 7.596 (1H, s, H- $\beta'$ ), 7.587 (1H, s, H-4'), 7.575 (1H, d,  $J = 3.6$  Hz, H-6'), 7.547 (1H, d,  $J = 2.4$  Hz, H-7'), 7.440 (1H, t,  $J = 8.4$  Hz, H-5), 3.047 (2H, t,  $J = 6.6$  Hz, Cyclopentanone-CH<sub>2</sub>CH<sub>2</sub>-), 2.912 (2H, t,  $J = 6.6$  Hz, Cyclopentanone-CH<sub>2</sub>CH<sub>2</sub>-). ESI-MS  $m/z$ : 446.1 (M)<sup>+</sup>.

### General procedure for synthesis of a11, a17, a18 and b21

To a solution of enamine **2a** or **2b** (0.40 mmol) and corresponding arylaldehyde (0.40 mmol) in EtOH (5 mL) was catalyzed by dry hydrogen chloride at room temperature. After 24 h, the resulting solution was diluted with saturated aqueous NaHCO<sub>3</sub>, the EtOH was then removed under reduced pressure and extracted with EtOAc (3×10 mL). The combined organic layers were washed with brine, dried over anhydrous MgSO<sub>4</sub>, filtered, and concentrated under reduced pressure. The residue

was further purified by flash column chromatography to provide MACs analogs **a11**, **a17**, **a18** and **b21**.

(2E,6E)-2-(2-hydroxy-3-methoxybenzylidene)-6-(2-nitrobenzylidene)cyclohexanone  
**(a11)**

Yellow powder, 65.7% yield, m.p 151.0-154.1 °C. <sup>1</sup>H-NMR (600 MHz, CDCl<sub>3</sub>) δ(ppm) 8.117 (1H, t, *J* = 16.8 Hz, H-4), 8.005 (1H, d, *J* = 7.8 Hz, H-3), 7.700 (1H, s, H-β), 7.669 (1H, s, H-β'), 7.598 (1H, t, *J* = 15.0 Hz, H-5), 7.556 (1H, d, *J* = 7.2 Hz, H-6), 7.482 (1H, t, *J* = 15.6 Hz, H-5'), 6.943 (1H, d, *J* = 7.8 Hz, H-6'), 6.768 (1H, d, *J* = 7.8 Hz, H-4'), 4.495 (1H, s, Ar-OH), 3.898 (3H, s, 3'-OCH<sub>3</sub>), 2.671 (2H, t, *J* = 15.8 Hz, Cyclohexanone-CH<sub>2</sub>CH<sub>2</sub>CH<sub>2</sub>-), 2.557 (2H, t, *J* = 15.8 Hz, Cyclohexanone-CH<sub>2</sub>CH<sub>2</sub>CH<sub>2</sub>-), 1.789-1.837 (2H, m, Cyclohexanone-CH<sub>2</sub>CH<sub>2</sub>CH<sub>2</sub>-). ESI-MS *m/z*: 364.9 M<sup>+</sup>.

(2E,6E)-2-(4-hydroxy-3-methoxybenzylidene)-6-(2-nitrobenzylidene)cyclohexanone  
**(a17)**

Orange powder, 50.6% yield, m.p 165.4-167.1 °C. <sup>1</sup>H-NMR (600 MHz, DMSO) δ(ppm) 9.608 (1H, s, Ar-OH), 8.154 (1H, d, *J* = 8.4 Hz, H-3), 7.800 (1H, t, *J* = 15.0 Hz, H-4), 7.748 (1H, s, H-β), 7.649 (1H, t, *J* = 15.6 Hz, H-5), 7.7624 (1H, s, H-β'), 7.568 (1H, d, *J* = 7.8 Hz, H-6), 7.153 (1H, s, H-2'), 7.078 (1H, d, *J* = 10.2 Hz, H-5'), 6.868 (1H, d, *J* = 8.4 Hz, H-6'), 3.816 (3H, s, Ar-OCH<sub>3</sub>), 2.918 (2H, t, *J* = 10.2 Hz, Cyclohexanone-CH<sub>2</sub>CH<sub>2</sub>CH<sub>2</sub>-), 2.612 (2H, t, *J* = 10.8 Hz, Cyclohexanone-CH<sub>2</sub>CH<sub>2</sub>CH<sub>2</sub>-), 1.678-1.719 (2H, m, Cyclohexanone-CH<sub>2</sub>CH<sub>2</sub>CH<sub>2</sub>-). ESI-MS *m/z*: 365.9 (M)<sup>+</sup>.

(2E,6E)-2-(3-hydroxy-4-methoxybenzylidene)-6-(2-nitrobenzylidene)cyclohexanone  
**(a18)**

Yellow powder, 47.0% yield, m.p 166.4-170.8 °C. <sup>1</sup>H-NMR (600 MHz, CDCl<sub>3</sub>) δ(ppm) 8.122 (1H, d, *J* = 8.4 Hz, H-3), 7.940 (1H, s, H-β), 7.750 (1H, s, H-β'), 7.638 (1H, t, *J* = 15.0 Hz, H-4), 7.490 (1H, t, *J* = 17.4 Hz, H-5), 7.367 (1H, d, *J* = 7.8 Hz, H-6), 7.123 (1H, s, H-2'), 7.033 (1H, d, *J* = 15.0 Hz, H-6'), 6.888 (1H, d, *J* = 8.4 Hz,

H-5'), 5.534 (1H, s, 3'-OH), 3.939 (3H, s, 4'-OCH<sub>3</sub>), 2.932 (2H, t,  $J = 10.8$  Hz, Cyclohexanone-CH<sub>2</sub>CH<sub>2</sub>CH<sub>2</sub>-), 2.595 (2H, t,  $J = 10.8$  Hz, Cyclohexanone-CH<sub>2</sub>CH<sub>2</sub>CH<sub>2</sub>-), 1.750-1.791 (2H, m, Cyclohexanone-CH<sub>2</sub>CH<sub>2</sub>CH<sub>2</sub>-). ESI-MS  $m/z$ : 364.9 (M<sup>+</sup>).

(2E,5E)-2-(3-bromo-4-hydroxybenzylidene)-5-(2-(trifluoromethyl)benzylidene)cyclopentanone (**b21**)

Yellow powder, 53.2% yield, m.p 164.2-166.9 °C. <sup>1</sup>H-NMR (600 MHz, CDCl<sub>3</sub>)  $\delta$  (ppm) 7.845 (1H, s, H-2'), 7.747 (1H, d,  $J = 7.8$  Hz, H-3), 7.666 (1H, d,  $J = 7.8$  Hz, H-6'), 7.601 (1H, s, H- $\beta$ ), 7.598 (1H, d,  $J = 4.2$  Hz, H-6), 7.504 (1H, s, H- $\beta'$ ), 7.474 (1H, t,  $J = 6$  Hz, H-5), 7.421 (1H, t,  $J = 6$  Hz, H-4), 7.086 (1H, d,  $J = 8.4$  Hz, H-5'), 3.033 (2H, t,  $J = 6$  Hz, Cyclopentanone-CH<sub>2</sub>CH<sub>2</sub>-), 2.979 (2H, t,  $J = 6$  Hz, Cyclopentanone-CH<sub>2</sub>CH<sub>2</sub>-). ESI-MS  $m/z$ : 422.9 (M)<sup>+</sup>.

### Synthesis of $\alpha,\beta$ -unsaturated ketones **5a**, **5b**

To a solution of 3,4-dimethoxybenzaldehyde or 2-methoxybenzaldehyde (1.00 equiv) in acetone (15 mL) was added 20% NaOH dropwise (1 mL). After stirring at room temperature for 4 h, the resulting mixture was diluted with brine and extracted with EtOAc (3 $\times$ 10 mL). The combined organic layers were washed with brine and dried over anhydrous MgSO<sub>4</sub>, filtered and concentrated under reduced pressure. The residue was further purified by chromatography on silica gel to give desired ketones **5a**, **5b**.

### General procedure for synthesis of **c9**, **c26**

To a solution of 3,4-dimethoxybenzaldehyde or 2-methoxybenzaldehyde (1.0 equiv) and 2-nitrobenzaldehyde (1.0 equiv) in dioxane suspension (15 mL), which NaOH power was added in dioxane, was added 20% NaOH dropwise (0.5 mL). After stirring at room temperature for 5 h, the resulting mixture was diluted with brine and extracted with EtOAc (3 $\times$ 10 mL). The combined organic layers were washed with brine and dried over anhydrous MgSO<sub>4</sub>, filtered and concentrated under reduced pressure. The residue was further purified by chromatography on silica gel to afford target compounds **c9**, **c26**.

(1E,4E)-1-(3,4-dimethoxyphenyl)-5-(2-nitrophenyl)penta-1,4-dien-3-one (**c9**)

Yellow powder, 70.0% yield, m.p 115.4-120.1 °C. <sup>1</sup>H-NMR (600 MHz, CDCl<sub>3</sub>) δ(ppm) 8.106 (1H, d, *J* = 16.2 Hz, H-β), 8.073 (1H, d, *J* = 8.4 Hz, H-3), 7.733 (1H, d, *J* = 16.2 Hz, H-β'), 7.725 (1H, d, *J* = 6.6 Hz, H-6), 7.678 (1H, t, *J* = 15.0 Hz, H-4), 7.562 (1H, t, *J* = 15.0 Hz, H-5), 7.225 (1H, d, *J* = 10.2 Hz, H-6'), 7.147 (1H, s, H-2'), 6.978 (1H, d, *J* = 16.2 Hz, H-α), 6.930 (1H, d, *J* = 15.6 Hz, H-α'), 6.906 (1H, d, *J* = 6.6 Hz, H-5'), 3.950 (3H, s, 3'-OCH<sub>3</sub>), 3.938 (3H, s, 4'-OCH<sub>3</sub>). ESI-MS *m/z*: 340.1 (M+H)<sup>+</sup>.

(1E,4E)-1-(2-methoxyphenyl)-5-(2-nitrophenyl)penta-1,4-dien-3-one (**c26**)

Yellow powder, 60.1% yield, m.p 141.9-144.3 °C. <sup>1</sup>H-NMR (600 MHz, CDCl<sub>3</sub>) δ(ppm) 8.122 (1H, d, *J* = 16.2 Hz, H-β), 8.079 (1H, d, *J* = 15.6 Hz, H-β'), 8.068 (1H, d, *J* = 6.6 Hz, H-3), 7.738 (1H, d, *J* = 7.2 Hz, H-6), 7.678 (1H, t, *J* = 15.0 Hz, H-4), 7.611 (1H, d, *J* = 6.0 Hz, H, H-6'), 7.555 (1H, t, *J* = 15.6 Hz, H-5), 7.390 (1H, t, *J* = 16.2 Hz, H-4'), 7.228 (1H, d, *J* = 16.2 Hz, H-α), 7.000 (1H, t, *J* = 10.8 Hz, H-5'), 6.961 (1H, d, *J* = 15.6 Hz, H-α'), 6.949 (1H, d, *J* = 8.4 Hz, H-3'), 3.933 (3H, s, 2'-OCH<sub>3</sub>). ESI-MS *m/z*: 310.3 (M+H)<sup>+</sup>.
